# Supplementary material for: Prevalence and incidence of neuromuscular conditions in the UK between 2000 and 2019: A retrospective study using primary care data
Source: PLOS journal article supplement (doi:10.1371/journal.pone.0261983), 2021-12-31
Supplement: S1 (10.1371/journal.pone.0261983.s001) [file journal.pone.0261983.s001.pdf]

**Table S1 – Hierarchical structure of classifications based on available Read codes.**

| Level 1                                                | Level 2                                                    | Level 3                             | Level 4                                                                                                        |
|--------------------------------------------------------|------------------------------------------------------------|-------------------------------------|----------------------------------------------------------------------------------------------------------------|
| <b>Motor Neuron Disorders</b>                          | Spinal muscular atrophy                                    |                                     |                                                                                                                |
|                                                        | Motor neurone disease                                      |                                     |                                                                                                                |
|                                                        | Post-Polio syndrome                                        |                                     |                                                                                                                |
| <b>Muscle disease</b><br>(excluding Rhabdomyolysis)    | Acquired myopathies                                        | Endocrine myopathy                  |                                                                                                                |
|                                                        |                                                            | Infectious myopathy                 |                                                                                                                |
|                                                        |                                                            | Inflammatory myopathies             | Dermatomyositis, Polymyositis                                                                                  |
|                                                        |                                                            | Toxic or drug-induced myopathy      |                                                                                                                |
|                                                        | Hereditary myopathies                                      | Congenital myopathies               | Congenital muscular dystrophy, Congenital myopathy                                                             |
|                                                        |                                                            | Metabolic myopathies                |                                                                                                                |
|                                                        |                                                            | Muscular dystrophies                | Becker, Duchenne, Emery–Dreifuss, Facioscapulohumeral, Limb girdle, Myotonic dystrophy Type 1, Oculopharyngeal |
|                                                        | Mitochondrial disease                                      |                                     |                                                                                                                |
|                                                        | Muscle channelopathies                                     | Myotonic disorders (non-dystrophic) | Myotonia congenita                                                                                             |
|                                                        |                                                            | Periodic paralysis                  |                                                                                                                |
| Myotonic disorders (unspecified) <sup>1</sup>          |                                                            |                                     |                                                                                                                |
| <b>Neuropathy</b><br>(excluding Acquired & non-immune) | Hereditary Neuropathies                                    | Charcot-Marie Tooth disease         |                                                                                                                |
|                                                        |                                                            | Other                               |                                                                                                                |
|                                                        | Inflammatory & autoimmune neuropathies                     | Guillain-Barré syndrome             |                                                                                                                |
|                                                        |                                                            | Other                               |                                                                                                                |
| <b>Neuromuscular Junction Disorder</b>                 | Lambert-Eaton syndrome                                     |                                     |                                                                                                                |
|                                                        | Myasthenia gravis                                          |                                     |                                                                                                                |
|                                                        | Other                                                      |                                     |                                                                                                                |
| <b>Not specified</b>                                   | Muscular or neuromuscular disease unspecified <sup>2</sup> |                                     |                                                                                                                |

GREY shading indicates the summary classification used in the analysis.

1 - This category only applies if they cannot be assigned to “Muscular Dystrophy” or “Myotonic Disorders (non-dystrophic)”

2 - This category only applies if they cannot be assigned to any of the above categories and mainly consists of “F39z.00 - Myopathy or muscular dystrophy NOS”
