# Supplementary material for: Prevalence and incidence of neuromuscular conditions in the UK between 2000 and 2019: A retrospective study using primary care data
Source: PLoS One. 2021 Dec 31;16(12):e0261983. doi: 10.1371/journal.pone.0261983 (PMC8719665; doi:10.1371/journal.pone.0261983)
Supplement: S2 Table — (PDF) [file pone.0261983.s002.pdf]

**Table S2 – Read Codes used in classifying conditions.**

| Read Code | Term                                                          | Classification                             |
|-----------|---------------------------------------------------------------|--------------------------------------------|
| AE1       | Late effects of acute poliomyelitis                           | Post-Polio Syndrome                        |
| AyuJ5     | [X]Sequelae of poliomyelitis                                  | Post-Polio Syndrome                        |
| C3080     | Medium chain acyl-CoA dehydrogenase deficiency                | Metabolic myopathies                       |
| C3081     | Multiple acyl-CoA dehydrogenase deficiencies                  | Metabolic myopathies                       |
| C310      | Glycogenosis - glycogen storage disease                       | Metabolic myopathies                       |
| C310-1    | Amylopectinosis                                               | Metabolic myopathies                       |
| C310-3    | Glycogen storage disease                                      | Metabolic myopathies                       |
| C3100     | McArdle's disease                                             | Metabolic myopathies                       |
| C3100-1   | Myophosphorylase deficiency                                   | Metabolic myopathies                       |
| C3100-2   | Glycogenosis, type 5                                          | Metabolic myopathies                       |
| C3101     | Generalised glycogenosis                                      | Metabolic myopathies                       |
| C3101-2   | Pompe's disease                                               | Metabolic myopathies                       |
| C3101-3   | Glycogenosis, type 2                                          | Metabolic myopathies                       |
| C3103     | Glycogenosis of liver and muscle                              | Metabolic myopathies                       |
| C3103-1   | Glycogenosis of liver and muscle                              | Metabolic myopathies                       |
| C3103-3   | Glycogenosis, type 3                                          | Metabolic myopathies                       |
| C3104     | Glycogenosis with hepatic cirrhosis                           | Metabolic myopathies                       |
| C3104-1   | Glycogenosis, type 4                                          | Metabolic myopathies                       |
| C3104-2   | Andersen's disease                                            | Metabolic myopathies                       |
| C310y     | Other specified glycogenosis                                  | Metabolic myopathies                       |
| C310z     | Glycogenosis NOS                                              | Metabolic myopathies                       |
| C3151     | Mitochondr encephalopathy, lact acidosis & strokelike episode | Mitochondrial disease                      |
| C3152     | Kearns-Sayre syndrome                                         | Mitochondrial disease                      |
| C3732     | Familial neuropathic amyloid                                  | Other Hereditary Neuropathy                |
| C373E     | Amyloid polyneuropathy type I                                 | Other Hereditary Neuropathy                |
| C373E-1   | Swedish type amyloid polyneuropathy                           | Other Hereditary Neuropathy                |
| C373E-2   | Andrade type amyloid polyneuropathy                           | Other Hereditary Neuropathy                |
| C373F     | Familial amyloid polyneuropathy type II                       | Other Hereditary Neuropathy                |
| C373F-1   | Swiss type amyloid polyneuropathy                             | Other Hereditary Neuropathy                |
| C373K     | Familial amyloid polyneuropathy, Iowa type                    | Other Hereditary Neuropathy                |
| C373K-1   | Van Allen type amyloid polyneuropathy                         | Other Hereditary Neuropathy                |
| C373K-2   | British type amyloid polyneuropathy                           | Other Hereditary Neuropathy                |
| C373K-3   | Familial amyloid polyneuropathy type III                      | Other Hereditary Neuropathy                |
| F10y0     | Alper's disease                                               | Mitochondrial disease                      |
| F10y1     | Leigh's disease                                               | Mitochondrial disease                      |
| F150      | Werdnig - Hoffmann disease                                    | Spinal Muscular Atrophy                    |
| F150-1    | Infantile spinal muscular atrophy                             | Spinal Muscular Atrophy                    |
| F151      | Spinal muscular atrophy                                       | Spinal Muscular Atrophy                    |
| F1510     | Unspecified spinal muscular atrophy                           | Spinal Muscular Atrophy                    |
| F1511     | Kugelberg - Welander disease                                  | Spinal Muscular Atrophy                    |
| F1511-1   | Juvenile spinal muscular atrophy                              | Spinal Muscular Atrophy                    |
| F1512     | Adult spinal muscular atrophy                                 | Spinal Muscular Atrophy                    |
| F151z     | Spinal muscular atrophy NOS                                   | Spinal Muscular Atrophy                    |
| F152      | Motor neurone disease                                         | Motor Neurone Disease                      |
| F1520     | Amyotrophic lateral sclerosis                                 | Motor Neurone Disease                      |
| F1521     | Progressive muscular atrophy                                  | Motor Neurone Disease                      |
| F1521-1   | Duchenne Aran muscular atrophy                                | Motor Neurone Disease                      |
| F1522     | Progressive bulbar palsy                                      | Motor Neurone Disease                      |
| F1523     | Pseudobulbar palsy                                            | Motor Neurone Disease                      |
| F1524     | Primary lateral sclerosis                                     | Motor Neurone Disease                      |
| F152z     | Motor neurone disease NOS                                     | Motor Neurone Disease                      |
| F29y1     | Postpolio syndrome                                            | Post-Polio Syndrome                        |
| F335      | Neuralgic amyotrophy                                          | Other Inflammatory & autoimmune neuropathy |
| F335-1    | Parsonage - Aldren - Turner syndrome                          | Other Inflammatory & autoimmune neuropathy |
| F360      | Hereditary peripheral neuropathy                              | Charcot-Marie Tooth                        |

| Read Code | Term                                               | Classification                                |
|-----------|----------------------------------------------------|-----------------------------------------------|
| F3600     | Dejerine-Sottas disease                            | Charcot-Marie Tooth                           |
| F360z     | Hereditary peripheral neuropathy NOS               | Charcot-Marie Tooth                           |
| F361      | Peroneal muscular atrophy                          | Charcot-Marie Tooth                           |
| F3610     | Charcot-Marie-Tooth disease                        | Charcot-Marie Tooth                           |
| F3610-2   | Charcot-Marie-Tooth syndrome                       | Charcot-Marie Tooth                           |
| F361z     | Peroneal muscular atrophy NOS                      | Charcot-Marie Tooth                           |
| F362      | Hereditary sensory neuropathy                      | Charcot-Marie Tooth                           |
| F363      | Refsum's disease                                   | Other Hereditary Neuropathy                   |
| F365      | Neuropathy in association with hereditary ataxia   | Other Hereditary Neuropathy                   |
| F368      | Hereditary motor and sensory neuropathy            | Charcot-Marie Tooth                           |
| F3680     | Hereditary motor and sensory neuropathy type I     | Charcot-Marie Tooth                           |
| F3681     | Hereditary motor and sensory neuropathy type II    | Charcot-Marie Tooth                           |
| F3682     | Hereditary motor and sensory neuropathy type III   | Charcot-Marie Tooth                           |
| F3683     | Hereditary motor and sensory neuropathy type IV    | Other Hereditary Neuropathy                   |
| F370      | Acute infective polyneuritis                       | Guillain-Barre                                |
| F3700     | Guillain-Barre syndrome                            | Guillain-Barre                                |
| F3701     | Postinfectious polyneuritis                        | Guillain-Barre                                |
| F3702     | Miller-Fisher syndrome                             | Guillain-Barre                                |
| F370z     | Acute infective polyneuritis NOS                   | Guillain-Barre                                |
| F371      | Polyneuropathy in collagen vascular disease        | Other Inflammatory & autoimmune neuropathy    |
| F3710     | Polyneuropathy in disseminated lupus erythematosus | Other Inflammatory & autoimmune neuropathy    |
| F3712     | Polyneuropathy in rheumatoid arthritis             | Other Inflammatory & autoimmune neuropathy    |
| F371z     | Polyneuropathy in collagen vascular disease NOS    | Other Inflammatory & autoimmune neuropathy    |
| F3748     | Polyneuropathy in porphyria                        | Other Inflammatory & autoimmune neuropathy    |
| F3749     | Polyneuropathy in sarcoidosis                      | Other Inflammatory & autoimmune neuropathy    |
| F37X      | Inflammatory polyneuropathy, unspecified           | Other Inflammatory & autoimmune neuropathy    |
| F38       | Myoneural disorders                                | Other Neuromuscular Junction Disorder         |
| F38-1     | Neuromuscular disease                              | Muscular or Neuromuscular Disease unspecified |
| F380      | Myasthenia gravis                                  | Myasthenia Gravis                             |
| F3800     | Persistent neonatal myasthenia gravis              | Myasthenia Gravis                             |
| F3801     | Juvenile or adult myasthenia gravis                | Myasthenia Gravis                             |
| F380z     | Myasthenia gravis NOS                              | Myasthenia Gravis                             |
| F381      | Myasthenic syndrome due to disease EC              | Other Neuromuscular Junction Disorder         |
| F3810     | Eaton-Lambert syndrome                             | Eaton-Lambert                                 |
| F3810-1   | Lambert-Eaton syndrome                             | Eaton-Lambert                                 |
| F3811     | Myasthenic syndrome due to other malignancy        | Other Neuromuscular Junction Disorder         |
| F3812     | Myasthenic syndrome due to botulism                | Other Neuromuscular Junction Disorder         |
| F3814     | Myasthenic syndrome due to hypothyroidism          | Other Neuromuscular Junction Disorder         |
| F3815     | Myasthenic syndrome due to pernicious anaemia      | Other Neuromuscular Junction Disorder         |
| F3816     | Myasthenic syndrome due to thyrotoxicosis          | Other Neuromuscular Junction Disorder         |
| F381z     | Myasthenic syndrome due to disease NOS             | Other Neuromuscular Junction Disorder         |
| F382      | Toxic myoneural disorder                           | Other Neuromuscular Junction Disorder         |
| F383      | Congenital and developmental myasthenia            | Other Neuromuscular Junction Disorder         |
| F38y      | Other specific myoneural disorder                  | Other Neuromuscular Junction Disorder         |
| F38y-1    | Amyotonia congenita                                | Other Neuromuscular Junction Disorder         |
| F38y-2    | Oppenheim's amyotonia                              | Other Neuromuscular Junction Disorder         |
| F38y-4    | Floppy infant syndrome                             | Other Neuromuscular Junction Disorder         |
| F38y-99   | Other myoneural disorders                          | Other Neuromuscular Junction Disorder         |
| F38z      | Myoneural disorder NOS                             | Other Neuromuscular Junction Disorder         |
| F39       | Muscular dystrophies and other myopathies          | Muscular dystrophy                            |
| F390      | Congenital hereditary muscular dystrophy           | Congenital myopathies & muscular dystrophies  |
| F3900     | Benign congenital myopathy                         | Congenital myopathies & muscular dystrophies  |
| F3901     | Central core disease                               | Congenital myopathies & muscular dystrophies  |
| F3902     | Centronuclear myopathy                             | Congenital myopathies & muscular dystrophies  |
| F3903     | Myotubular myopathy                                | Congenital myopathies & muscular dystrophies  |
| F3904     | Nemaline body disease                              | Congenital myopathies & muscular dystrophies  |
| F3905     | Congenital myopathy                                | Congenital myopathies & muscular dystrophies  |

| Read Code | Term                                                      | Classification                               |
|-----------|-----------------------------------------------------------|----------------------------------------------|
| F390z     | Congenital hereditary muscular dystrophy NOS              | Congenital myopathies & muscular dystrophies |
| F391      | Hereditary progressive muscular dystrophy                 | Muscular dystrophy                           |
| F3910     | Duchenne muscular dystrophy                               | Muscular dystrophy                           |
| F3910-1   | Pseudohypertrophic dystrophy                              | Muscular dystrophy                           |
| F3911     | Erb's muscular dystrophy                                  | Muscular dystrophy                           |
| F3912     | Pelvic muscular dystrophy                                 | Muscular dystrophy                           |
| F3913     | Other limb-girdle muscular dystrophy                      | Muscular dystrophy                           |
| F3914     | Facioscapulohumeral muscular dystrophy                    | Muscular dystrophy                           |
| F3914-1   | Facioscapulohumeral atrophy                               | Muscular dystrophy                           |
| F3915     | Distal (Gower's) muscular dystrophy                       | Muscular dystrophy                           |
| F3916     | Ocular muscular dystrophy                                 | Muscular dystrophy                           |
| F3917     | Oculopharyngeal muscular dystrophy                        | Muscular dystrophy                           |
| F3918     | Becker muscular dystrophy                                 | Muscular dystrophy                           |
| F3919     | Hauptmann-Thannhauser muscular dystrophy                  | Muscular dystrophy                           |
| F391A     | Emery-Dreifuss muscular dystrophy                         | Muscular dystrophy                           |
| F391B     | Cardiomyopathy in Duchenne muscular dystrophy             | Muscular dystrophy                           |
| F391y     | Other specified hereditary progressive muscular dystrophy | Muscular dystrophy                           |
| F391y-1   | Distal dystrophy                                          | Muscular dystrophy                           |
| F391z     | Hereditary progressive muscular dystrophy NOS             | Muscular dystrophy                           |
| F392      | Myotonic disorders                                        | Myotonic Disorders (unspecified)             |
| F3920     | Dystrophia myotonica (Steinert's disease)                 | Muscular dystrophy                           |
| F3920-1   | Steinert's disease                                        | Muscular dystrophy                           |
| F3921     | Myotonia congenita (Thomsen's disease)                    | Myotonic Disorders (non-dystrophic)          |
| F3921-1   | Thomsen's disease                                         | Myotonic Disorders (non-dystrophic)          |
| F3922     | Paramyotonia congenita (Eulenburg's disease)              | Myotonic Disorders (non-dystrophic)          |
| F3922-1   | Eulenburg's disease                                       | Myotonic Disorders (non-dystrophic)          |
| F3923     | Infantile myotonia                                        | Myotonic Disorders (non-dystrophic)          |
| F3925     | Proximal myotonic myopathy                                | Muscular dystrophy                           |
| F392y     | Other specified myotonic disorder                         | Myotonic Disorders (unspecified)             |
| F392z     | Myotonic disorder NOS                                     | Myotonic Disorders (unspecified)             |
| F393      | Familial periodic paralysis                               | Periodic paralysis                           |
| F393-1    | Familial hypokalaemic periodic paralysis                  | Periodic paralysis                           |
| F394      | Toxic myopathy                                            | Toxic or drug-induced myopathy               |
| F3940     | Drug-induced myopathy                                     | Toxic or drug-induced myopathy               |
| F3941     | Alcoholic myopathy                                        | Toxic or drug-induced myopathy               |
| F395      | Myopathy due to endocrine disease EC                      | Endocrine myopathy                           |
| F3950     | Myopathy due to Addison's disease                         | Endocrine myopathy                           |
| F3951     | Myopathy due to Cushing's syndrome                        | Endocrine myopathy                           |
| F3952     | Myopathy due to hypopituitarism                           | Endocrine myopathy                           |
| F3953     | Myopathy due to myxoedema                                 | Endocrine myopathy                           |
| F3954     | Myopathy due to thyrotoxicosis                            | Endocrine myopathy                           |
| F395z     | Myopathy due to endocrine disease NOS                     | Endocrine myopathy                           |
| F396      | Symptomatic inflammatory myopathy in disease EC           | Inflammatory myopathies                      |
| F3960     | Myopathy due to amyloid                                   | Inflammatory myopathies                      |
| F3961     | Myopathy due to disseminated lupus erythematosus          | Inflammatory myopathies                      |
| F3962     | Myopathy due to malignant disease                         | Inflammatory myopathies                      |
| F3963     | Myopathy due to polyarteritis nodosa                      | Inflammatory myopathies                      |
| F3964     | Myopathy due to rheumatoid arthritis                      | Inflammatory myopathies                      |
| F3965     | Myopathy due to sarcoidosis                               | Inflammatory myopathies                      |
| F3966     | Myopathy due to scleroderma                               | Inflammatory myopathies                      |
| F3967     | Myopathy due to Sjogren's disease                         | Inflammatory myopathies                      |
| F396z     | Symptomatic inflammatory myopathy in disease NOS          | Inflammatory myopathies                      |
| F398      | Myopathy in metabolic diseases                            | Metabolic myopathies                         |
| F39B      | Muscular dystrophy                                        | Muscular dystrophy                           |
| F39W      | Inflammatory myopathy, not elsewhere classified           | Inflammatory myopathies                      |
| F39X      | Mitochondrial myopathy, not elsewhere classified          | Mitochondrial disease                        |

| Read Code | Term                                                        | Classification                                |
|-----------|-------------------------------------------------------------|-----------------------------------------------|
| F39y      | Other myopathies and muscular dystrophies                   | Muscular dystrophy                            |
| F39z      | Myopathy or muscular dystrophy NOS                          | Muscular or Neuromuscular Disease unspecified |
| F39z-99   | Myopathy NOS                                                | Muscular or Neuromuscular Disease unspecified |
| F4Gy1     | Extraocular muscle myopathy                                 | Muscular or Neuromuscular Disease unspecified |
| F4J71     | Progressive external ophthalmoplegia                        | Mitochondrial disease                         |
| Fyu11     | [X]Other inherited spinal muscular atrophy                  | Spinal Muscular Atrophy                       |
| Fyu71     | [X]Other inflammatory polyneuropathies                      | Other Inflammatory & autoimmune neuropathy    |
| Fyu77     | [X]Polyneuropathy/systemic connective tissue disorders CE   | Other Inflammatory & autoimmune neuropathy    |
| Fyu7B     | [X]Inflammatory polyneuropathy, unspecified                 | Other Inflammatory & autoimmune neuropathy    |
| Fyu8      | [X]Diseases of myoneural junction and muscle                | Other Neuromuscular Junction Disorder         |
| Fyu80     | [X]Other specified myoneural disorders                      | Other Neuromuscular Junction Disorder         |
| Fyu81     | [X]Other primary disorders of muscles                       | Muscular or Neuromuscular Disease unspecified |
| Fyu82     | [X]Other specified myopathies                               | Muscular or Neuromuscular Disease unspecified |
| Fyu83     | [X]Myasthenic syndromes in endocrine diseases CE            | Other Neuromuscular Junction Disorder         |
| Fyu84     | [X]Other myasthenic syndromes in neoplastic disease CE      | Other Neuromuscular Junction Disorder         |
| Fyu85     | [X]Myasthenic syndromes/other diseases classified elsewhere | Other Neuromuscular Junction Disorder         |
| Fyu86     | [X]Myopathy/infectious+parasitic diseases CE                | Infectious myopathy                           |
| Fyu87     | [X]Myopathy in endocrine diseases classified elsewhere      | Endocrine myopathy                            |
| Fyu88     | [X]Myopathy in metabolic diseases classified elsewhere      | Metabolic myopathies                          |
| Fyu89     | [X]Myopathy in other diseases classified elsewhere          | Muscular or Neuromuscular Disease unspecified |
| Fyu8A     | [X]Mitochondrial myopathy, not elsewhere classified         | Mitochondrial disease                         |
| Fyu8B     | [X]Inflammatory myopathy, not elsewhere classified          | Inflammatory myopathies                       |
| G552-1    | Becker's disease                                            | Myotonic Disorders (non-dystrophic)           |
| G5581     | Cardiomyopathy in myotonic dystrophy                        | Muscular dystrophy                            |
| G5582     | Dystrophic cardiomyopathy                                   | Muscular or Neuromuscular Disease unspecified |
| H57y1     | Lung disease with polymyositis                              | Inflammatory myopathies                       |
| N003      | Dermatomyositis                                             | Inflammatory myopathies                       |
| N003-1    | Poikilodermatomyositis                                      | Inflammatory myopathies                       |
| N0030     | Juvenile dermatomyositis                                    | Inflammatory myopathies                       |
| N0031     | Dermatopolymyositis in neoplastic disease                   | Inflammatory myopathies                       |
| N003X     | Dermatopolymyositis, unspecified                            | Inflammatory myopathies                       |
| N004      | Polymyositis                                                | Inflammatory myopathies                       |
| N230      | Infective myositis                                          | Infectious myopathy                           |
| N230-1    | Purulent myositis                                           | Infectious myopathy                           |
| N230-2    | Suppurative myositis                                        | Infectious myopathy                           |
| N2300     | Infective myositis-neck                                     | Infectious myopathy                           |
| N2301     | Infective myositis-back                                     | Infectious myopathy                           |
| N2302     | Infective myositis-shoulder                                 | Infectious myopathy                           |
| N2303     | Infective myositis-arm                                      | Infectious myopathy                           |
| N2304     | Infective myositis-forearm                                  | Infectious myopathy                           |
| N2305     | Infective myositis-hand                                     | Infectious myopathy                           |
| N2306     | Infective myositis-pelvis                                   | Infectious myopathy                           |
| N2307     | Infective myositis-thigh                                    | Infectious myopathy                           |
| N2308     | Infective myositis-leg                                      | Infectious myopathy                           |
| N2309     | Infective myositis-foot                                     | Infectious myopathy                           |
| N230A     | Muscle abscess                                              | Infectious myopathy                           |
| N230B     | Muscle abscess-neck                                         | Infectious myopathy                           |
| N230C     | Muscle abscess-back                                         | Infectious myopathy                           |
| N230D     | Muscle abscess-shoulder                                     | Infectious myopathy                           |
| N230E     | Muscle abscess-arm                                          | Infectious myopathy                           |
| N230F     | Muscle abscess-forearm                                      | Infectious myopathy                           |
| N230G     | Muscle abscess-hand                                         | Infectious myopathy                           |
| N230H     | Muscle abscess-pelvis                                       | Infectious myopathy                           |

| Read Code | Term                                                   | Classification          |
|-----------|--------------------------------------------------------|-------------------------|
| N230J     | Muscle abscess-thigh                                   | Infectious myopathy     |
| N230K     | Muscle abscess-leg                                     | Infectious myopathy     |
| N230L     | Muscle abscess-foot                                    | Infectious myopathy     |
| N2332     | Myositis in sarcoidosis                                | Inflammatory myopathies |
| N2334     | Antisynthetase syndrome                                | Inflammatory myopathies |
| N23y0     | Interstitial myositis                                  | Inflammatory myopathies |
| Nyu44     | [X]Other dermatomyositis                               | Inflammatory myopathies |
| Nyu48     | [X]Dermato(poly)myositis in neoplastic disease CE      | Inflammatory myopathies |
| Nyu4E     | [X]Dermatopolymyositis, unspecified                    | Inflammatory myopathies |
| Nyu86     | [X]Myositis in bacterial diseases classified elsewhere | Infectious myopathy     |
| Nyu87     | [X]Myositis in protozoal and parasitic infections CE   | Infectious myopathy     |
| Nyu88     | [X]Myositis in other infectious diseases CE            | Infectious myopathy     |
| Nyu89     | [X]Myositis in sarcoidosis classified elsewhere        | Inflammatory myopathies |

Note: Two EMIS LV codes (which have no Read code equivalent) were additionally used in the definitions

- HNG0055 (Duchenne muscular dystrophy) = Muscular dystrophy
- HNG0179 (Neuromuscular condition) = Muscular or neuromuscular disease unspecified
